# Supplementary material
Source: publisher figshare collection journal article supplement (https://brill.figshare.com/ndownloader/files/38854101)
Supplement: Supplementary file 1 [file 38854101]

Supplementary information for:

*Female preferences for higher vocal effort in Alston’s singing mice*


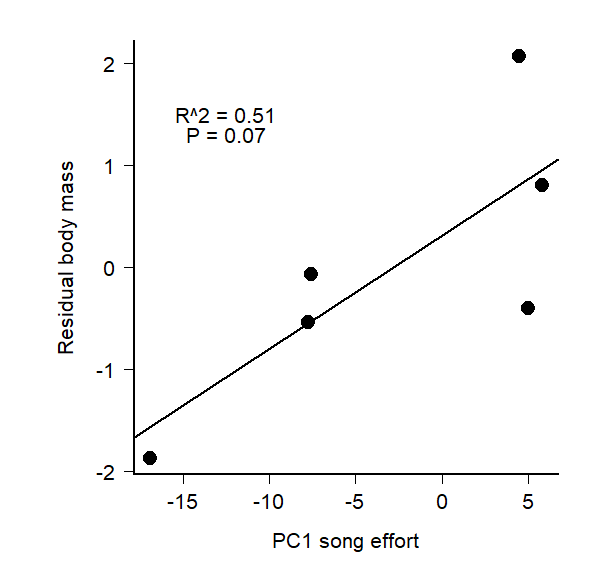


**Figure S1.** PC1 effort score vs RBM for the stimulus songs
